# Supplementary material for: Identification of Scd5 as a functional regulator of visceral fat deposition and distribution
Source: PubMed Central journal article supplement — iScience. 2022 Feb 12;25(3):103916. doi: 10.1016/j.isci.2022.103916 (PMC8889148; doi:10.1016/j.isci.2022.103916), 2022-02-12
Supplement: mmc1.pdf [file mmc1.pdf]

iScience, Volume 25

## **Supplemental information**

### **Identification of *Scd5* as a functional regulator of visceral fat deposition and distribution**

**Qi Zhang, Shaoyang Sun, Yinglan Zhang, Xu Wang, and Qiang Li**



**Figure S2.** The resulting amino acid sequence changes of zScd knockout. Related to Figure 2.**A original zScd (Scd5) amino sequence**

```

MPDSDVKAPVLQPQLEAMEDEFDPLYKEKPGPKPPMKIVWRNVILMSLLHIAAVYGLFLIPSAHPLTLLWAFACF
1| 10| 20| 30| 40| 50| 60| 70|
VYGGGLGITAGVHRLWSHRSYKATLPLRLIFLAIGNSMAFQNDIYEWSRDRHVHHKYSETDADPHNSNRGFFFSHVG
80| 90| 100| 110| 120| 130| 140| 150|
WLLVRKHPEVIERGRKLELTDLKADKVVVFQRRFYKLSVVLVLCFVVPTVVPCYMWGESLWIAYFIPTLLRYALGL
160| 170| 180| 190| 200| 210| 220|
NSTWLVNSAAHMGWRNPYDGNIGPRENRFVTFSAIGEGYHNYHHTFPYDYSTSEYGWKLNLTTIFVDTMCFGLLA
230| 240| 250| 260| 270| 280| 290| 300|
SNRKRVSKELILARVKRTGDGSYRSG*
310| 320| 327

```

**B edited zScd (Scd5) amino sequence**

```

MPDSDVKAPVLQPQLEAMEDEFDPLYKEKPGPKPPMKIVWRNVILMSLLHIAAVYGLFLIPSAHPLTLLWAFACF
1| 10| 20| 30| 40| 50| 60| 70|
VYGGGLQAFITDCGVTDHIKPLYLCASFWPSETPWPSRMTSMNGPGITACITSTPRRTPTLTTQTGAFSFLTLAGCW
80| 90| 100| 110| 120| 130| 140| 150|
FENTRKSSREDAN*
160| 164

```

**Figure S3.** *scd5*<sup>-/-</sup> showed unaffected SAT and deposited VAT. A. SAT volumn of 4mpf *scd5*<sup>-/-</sup> had no significant differences with *scd5*<sup>+/+</sup>. B. Lateral view example of adipose tissues 3D reconstruction of VAT (green) and SAT (red). Related to Figure 2.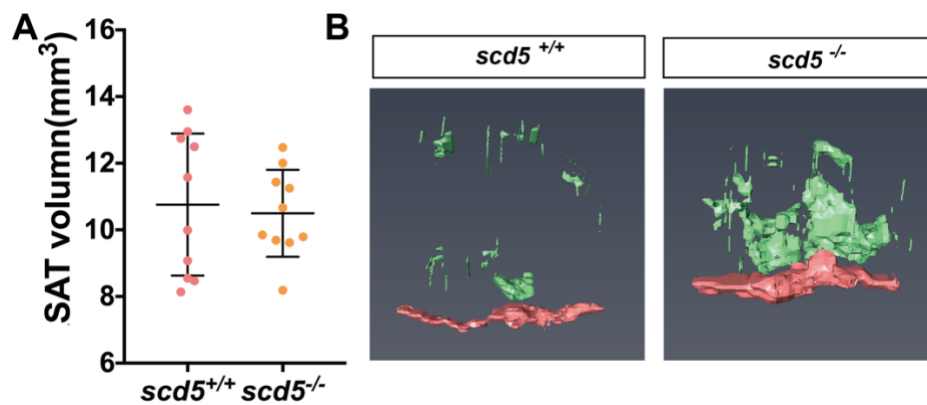

**Figure S4.** Lateral view example of adipose tissues 3D reconstruction of four dietary supplementations. VAT (green) and SAT (red). Related to Figure 3.

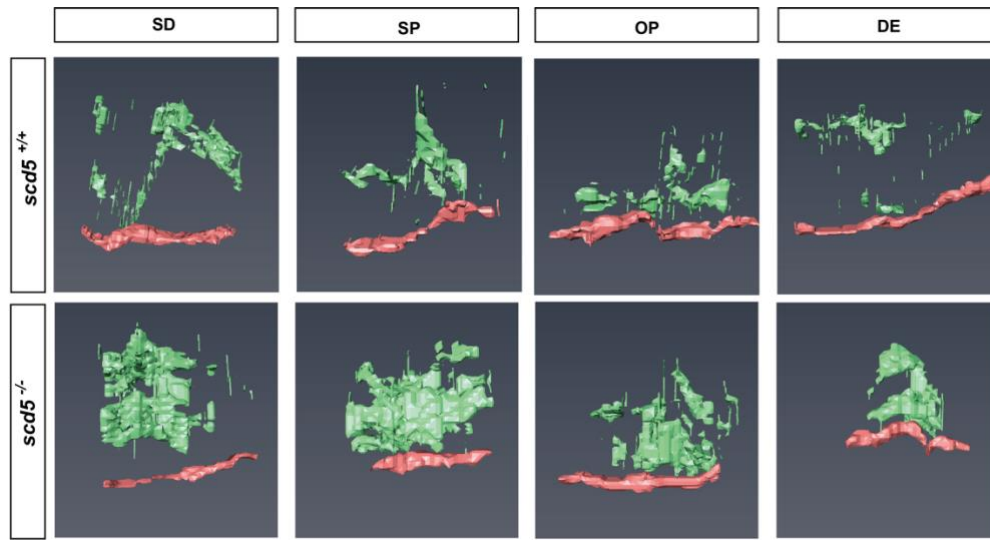

**Figure S5.** Data statistics on body length, spine length and SAT volume of four different dietary supplementations fed zebrafish. A-C, Two-way ANOVA results of every groups compared to *scd5*<sup>+/+</sup>-SD were shown. D-F, Two-way ANOVA results of three diets vs control for *scd5*<sup>+/+</sup> and *scd5*<sup>-/-</sup>. \*\*\*P < 0.001 represents statistical significance of interaction between genotype and dietary. Data are represented as mean ± SD, all dots are shown. Related to Figure 3.

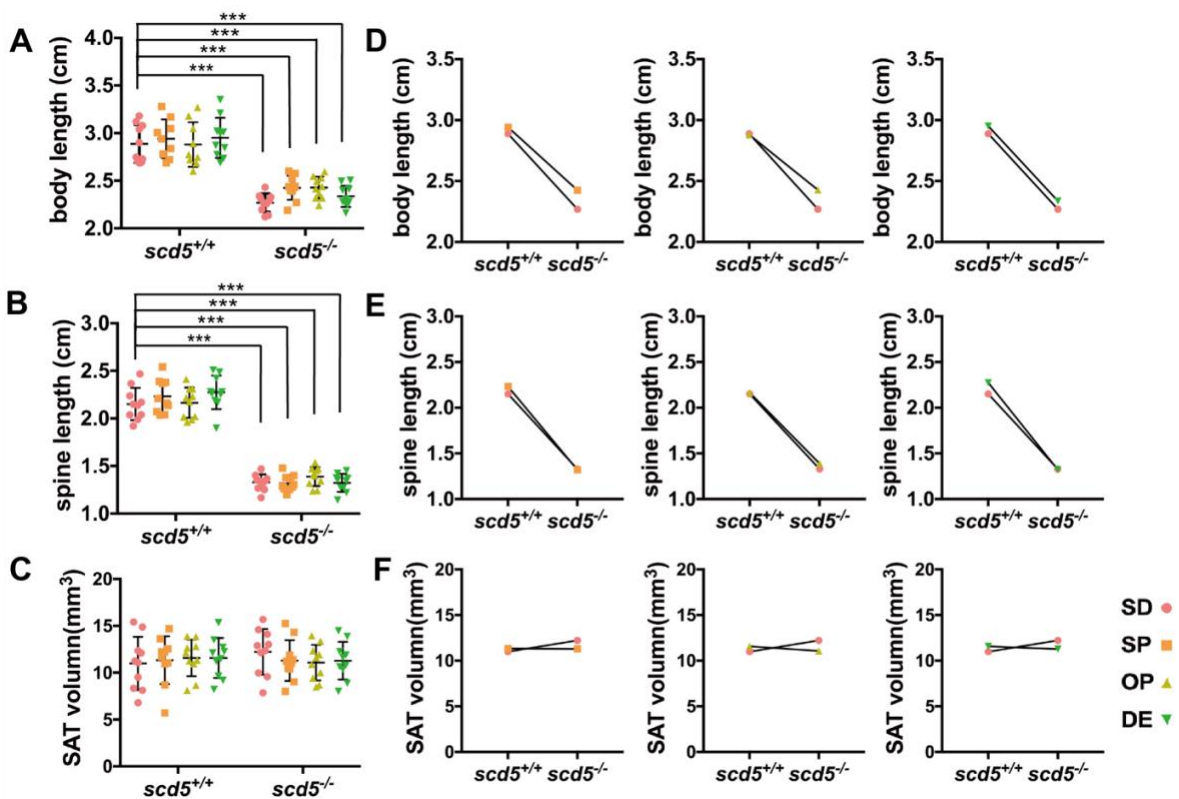

**Figure S6.** Top 20 significant GO terms on *scd5*-V-down gene sets (A) and *scd5*-S-down gene sets (B). Related to Figure 5.

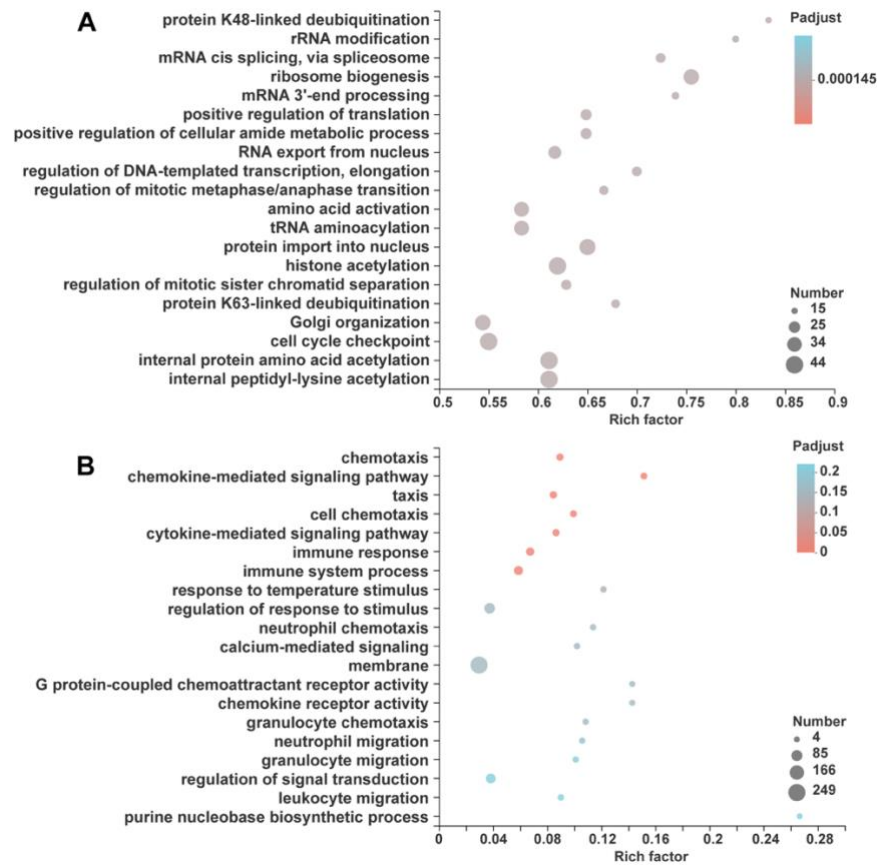

**Figure S7.** Relative expression of key nodes of AMPK signaling pathways in brain of *scd5*<sup>+/+</sup> and *scd5*<sup>-/-</sup>. n=4. \*P < 0.05, \*\*P < 0.01, \*\*\*\*P < 0.0001 represents statistical significance (unpaired t test). Related to STAR Methods " Real-time Quantitative Polymerase Chain Reaction (RT-qPCR) Analysis " section.

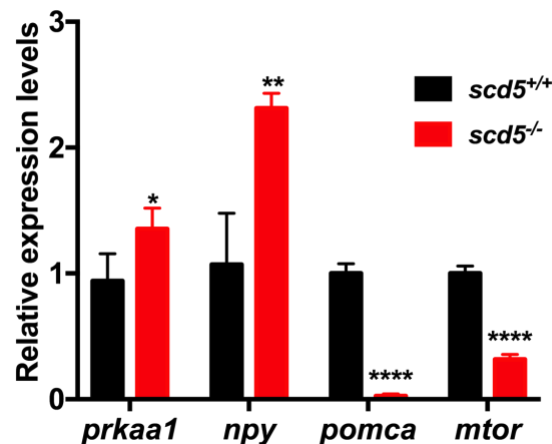

**Table S2.** Experimental diet compositions. Related to STAR Methods " Dietary, feeding and measurement" section.

|                               | SD  | SP  | OP  | DE  |
|-------------------------------|-----|-----|-----|-----|
| A. Diet (%DM)                 |     |     |     |     |
| Crude protein                 | 55  | 55  | 55  | 55  |
| Crude fat                     | 16  | 16  | 16  | 16  |
| Crude fiber                   | 2.5 | 2.5 | 2.5 | 2.5 |
| Carbohydrate                  | 10  | 10  | 10  | 10  |
| ash                           | 15  | 15  | 15  | 15  |
| phosphorus                    | 1.5 | 1.5 | 1.5 | 1.5 |
| B. FA (mg g <sup>-1</sup> DM) |     |     |     |     |
| Stearic acid                  | —   | 35  | —   | —   |
| Palmitic acid                 | —   | 35  | —   | —   |
| Oleic acid                    | —   | —   | 35  | —   |
| Palmitoleic acid              | —   | —   | 35  | —   |
| DHA                           | —   | —   | —   | 35  |
| EPA                           | —   | —   | —   | 35  |

**Table S3.** Primers used for QRT-pcr. Related to STAR Methods " Real-time Quantitative Polymerase Chain Reaction (RT-qPCR) Analysis " section.

| Primer name | Primer sequence (5'-3')   |
|-------------|---------------------------|
| actin-f     | cgagctgttcccatcca         |
| actin-r     | tcaccaacgtagctgtctttctg   |
| wnt10b-f    | attccagaggatctcctcgt      |
| wnt10b-r    | tgtcagtaactacctgtctgc     |
| sfrp5-f     | ctacagtgtgagaagtccc       |
| sfrp5-r     | ctttggaaactggagtctgag     |
| pparaa-f    | tcaactcctttcacatgctg      |
| pparaa-r    | ccggagttaagacatctaataatcg |
| pparab-f    | atcatctgctgtggagatcg      |
| pparab-r    | gagaacgtaacaatgctctcc     |
| pparg-f     | atcgactacgagaacaaccc      |
| pparag-r    | tgtcctgtagctgtacatgtg     |
| cebpa-f     | ctacattgatccgtctgcc       |
| cebpa-r     | ggagctgttgggaataagtc      |
| cebpb-f     | gcttcatgatatttctgagcac    |
| cebpb-r     | caaagagtccaaatagatgctg    |
| cebpd-f     | cctgctatctatgacgatgag     |

|          |                           |
|----------|---------------------------|
| cebpd-r  | ttgacatggactcaatgtatgc    |
| fas-f    | catattctgggtgtgcgtg       |
| fas-r    | acccatcagtgaatccagac      |
| acc-f    | actgaggtcacagattaccg      |
| acc-r    | ctcaaatgatgcttccttgg      |
| acox1-f  | gagaaatagagtctctggttattgg |
| acox1-r  | catatcgctcacttcgagag      |
| acadl-f  | tattccacagatggctgct       |
| acadl-r  | actccttgaaggctactgc       |
| acaal-f  | ttctccggatgtaatggg        |
| acaal-r  | tatcatccacagtcagtccag     |
| phyh-f   | gtggagtgttctactggac       |
| phyh-r   | ggtcttcttacctgtgtctg      |
| lpin1-f  | gcactatgctaccaatggg       |
| lpin1-r  | tcttctcaatgacctccctg      |
| pck1-f   | gaagaagtgcttcgctctg       |
| pck1-r   | tggtgatgcccaaatcag        |
| prkaal-f | gatggagagtttctaaggacga    |
| prkaal-r | ccctgcgtataacctcca        |
| pomca-f  | gatctgaagtcagagctcag      |
| pomca-r  | gtatgcattccaagatgttctc    |



## Supplementary Material

|        |                           |
|--------|---------------------------|
| npy-f  | aacctcataacaaggcagag      |
| npy-r  | tcctcatatctggtctggg       |
| mtor-f | ggtacaagcaaacatttgagga    |
| mtor-r | gatcatccttattcatccctttctc |

---
